# Supplementary material
Source: ML conference proceedings conference paper supplement (https://openreview.net/forum?id=QUMZJgrjN0)

BUS\_BREAKDOWN

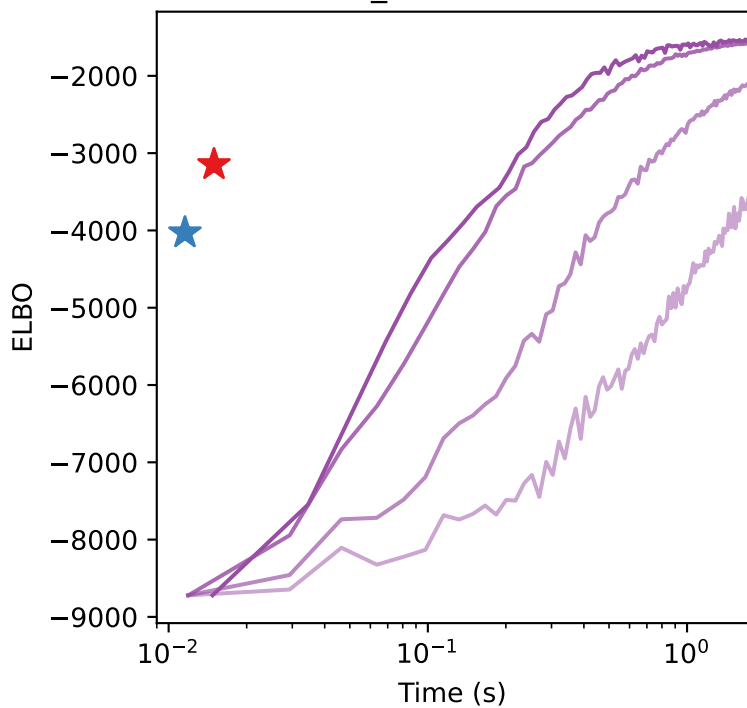

CHIMPANZEES

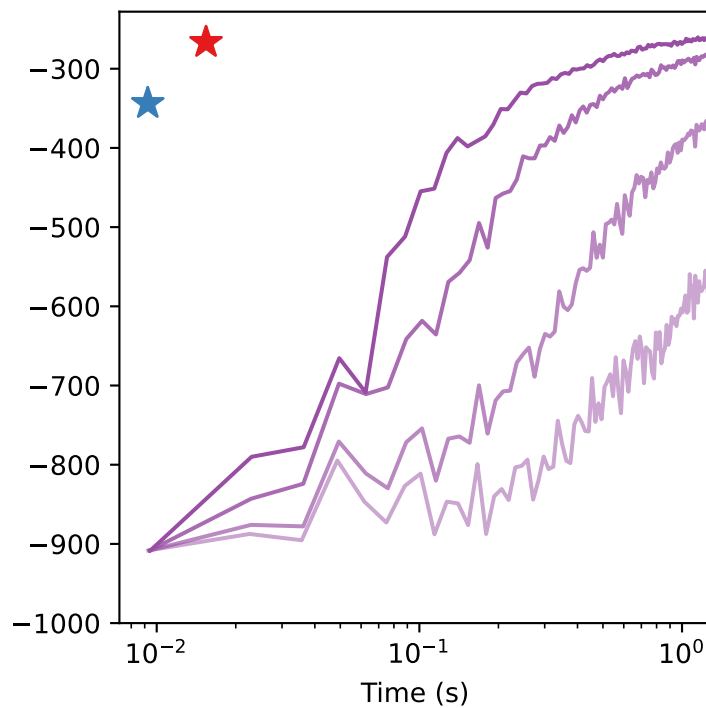

MOVIELENS

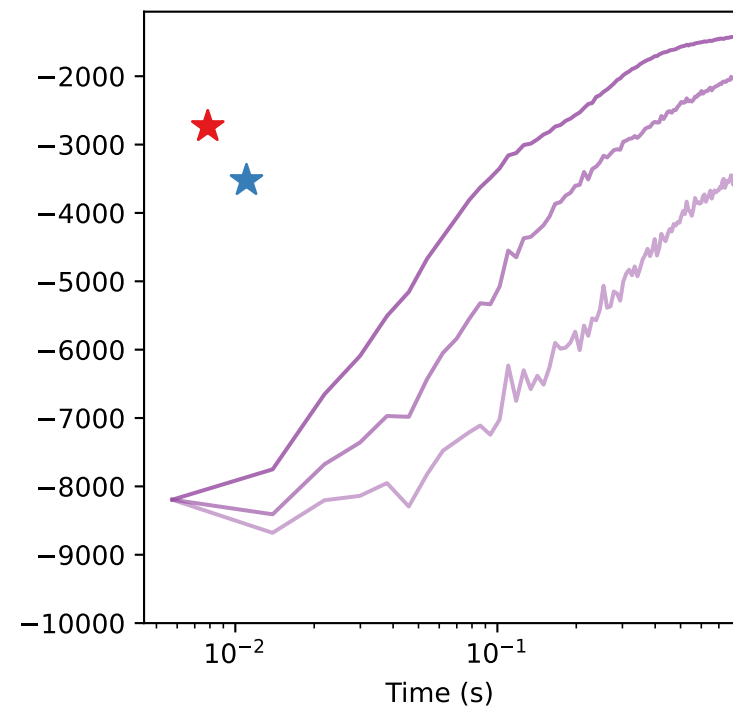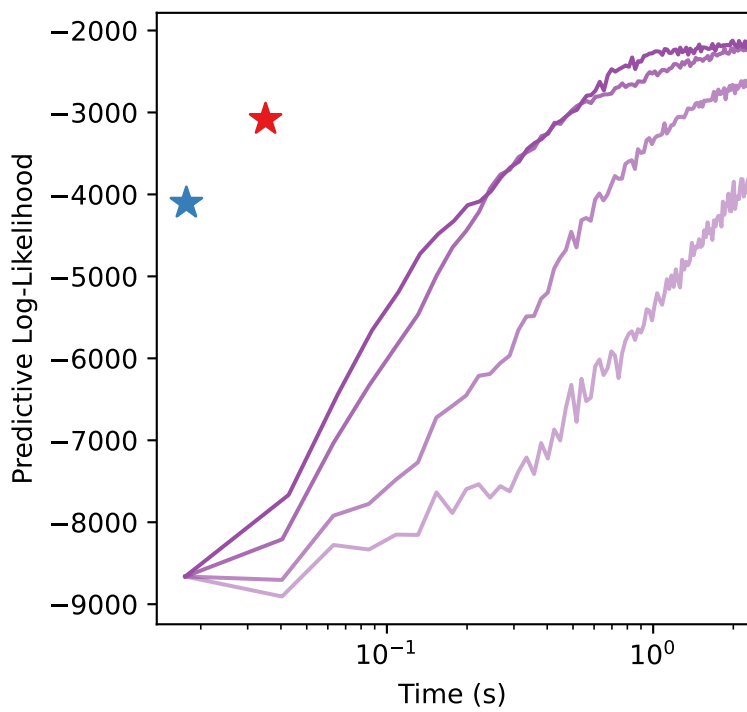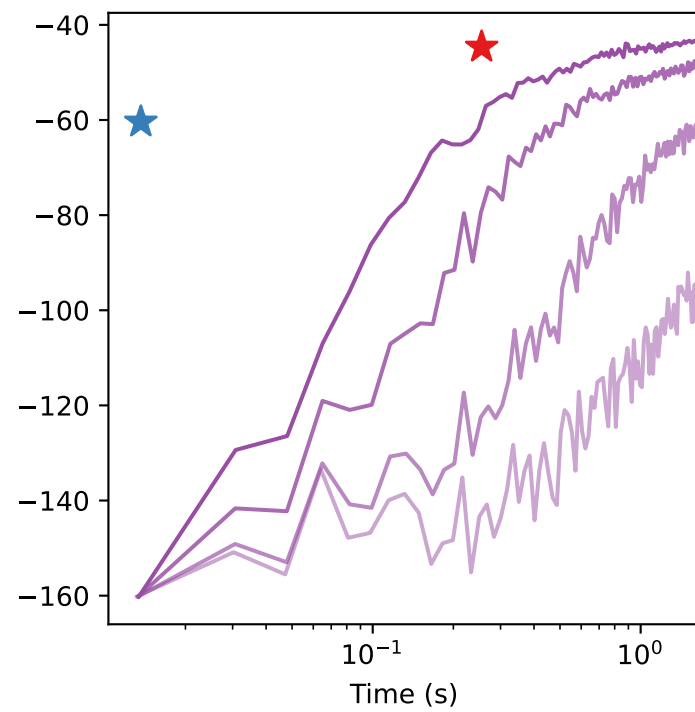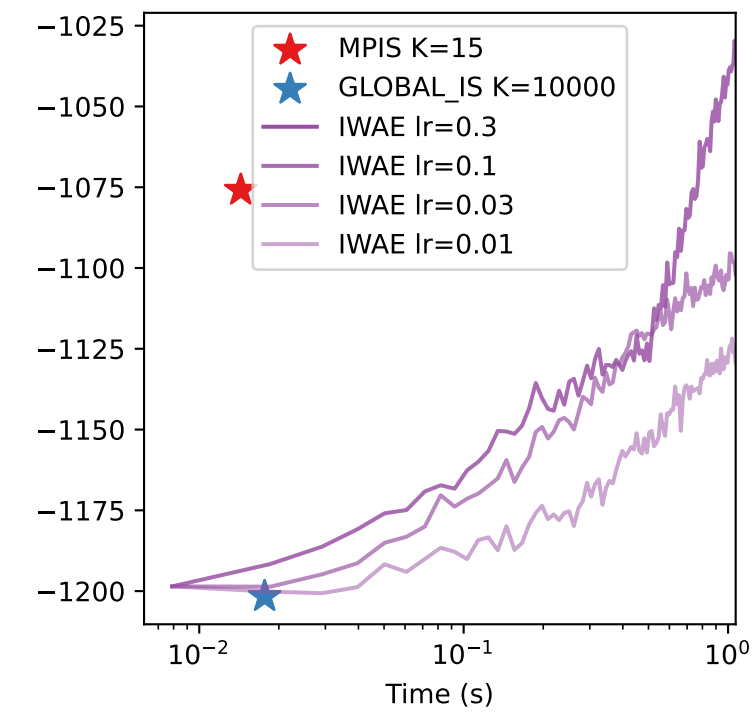

Supplement: supplementary_material [file attachment]

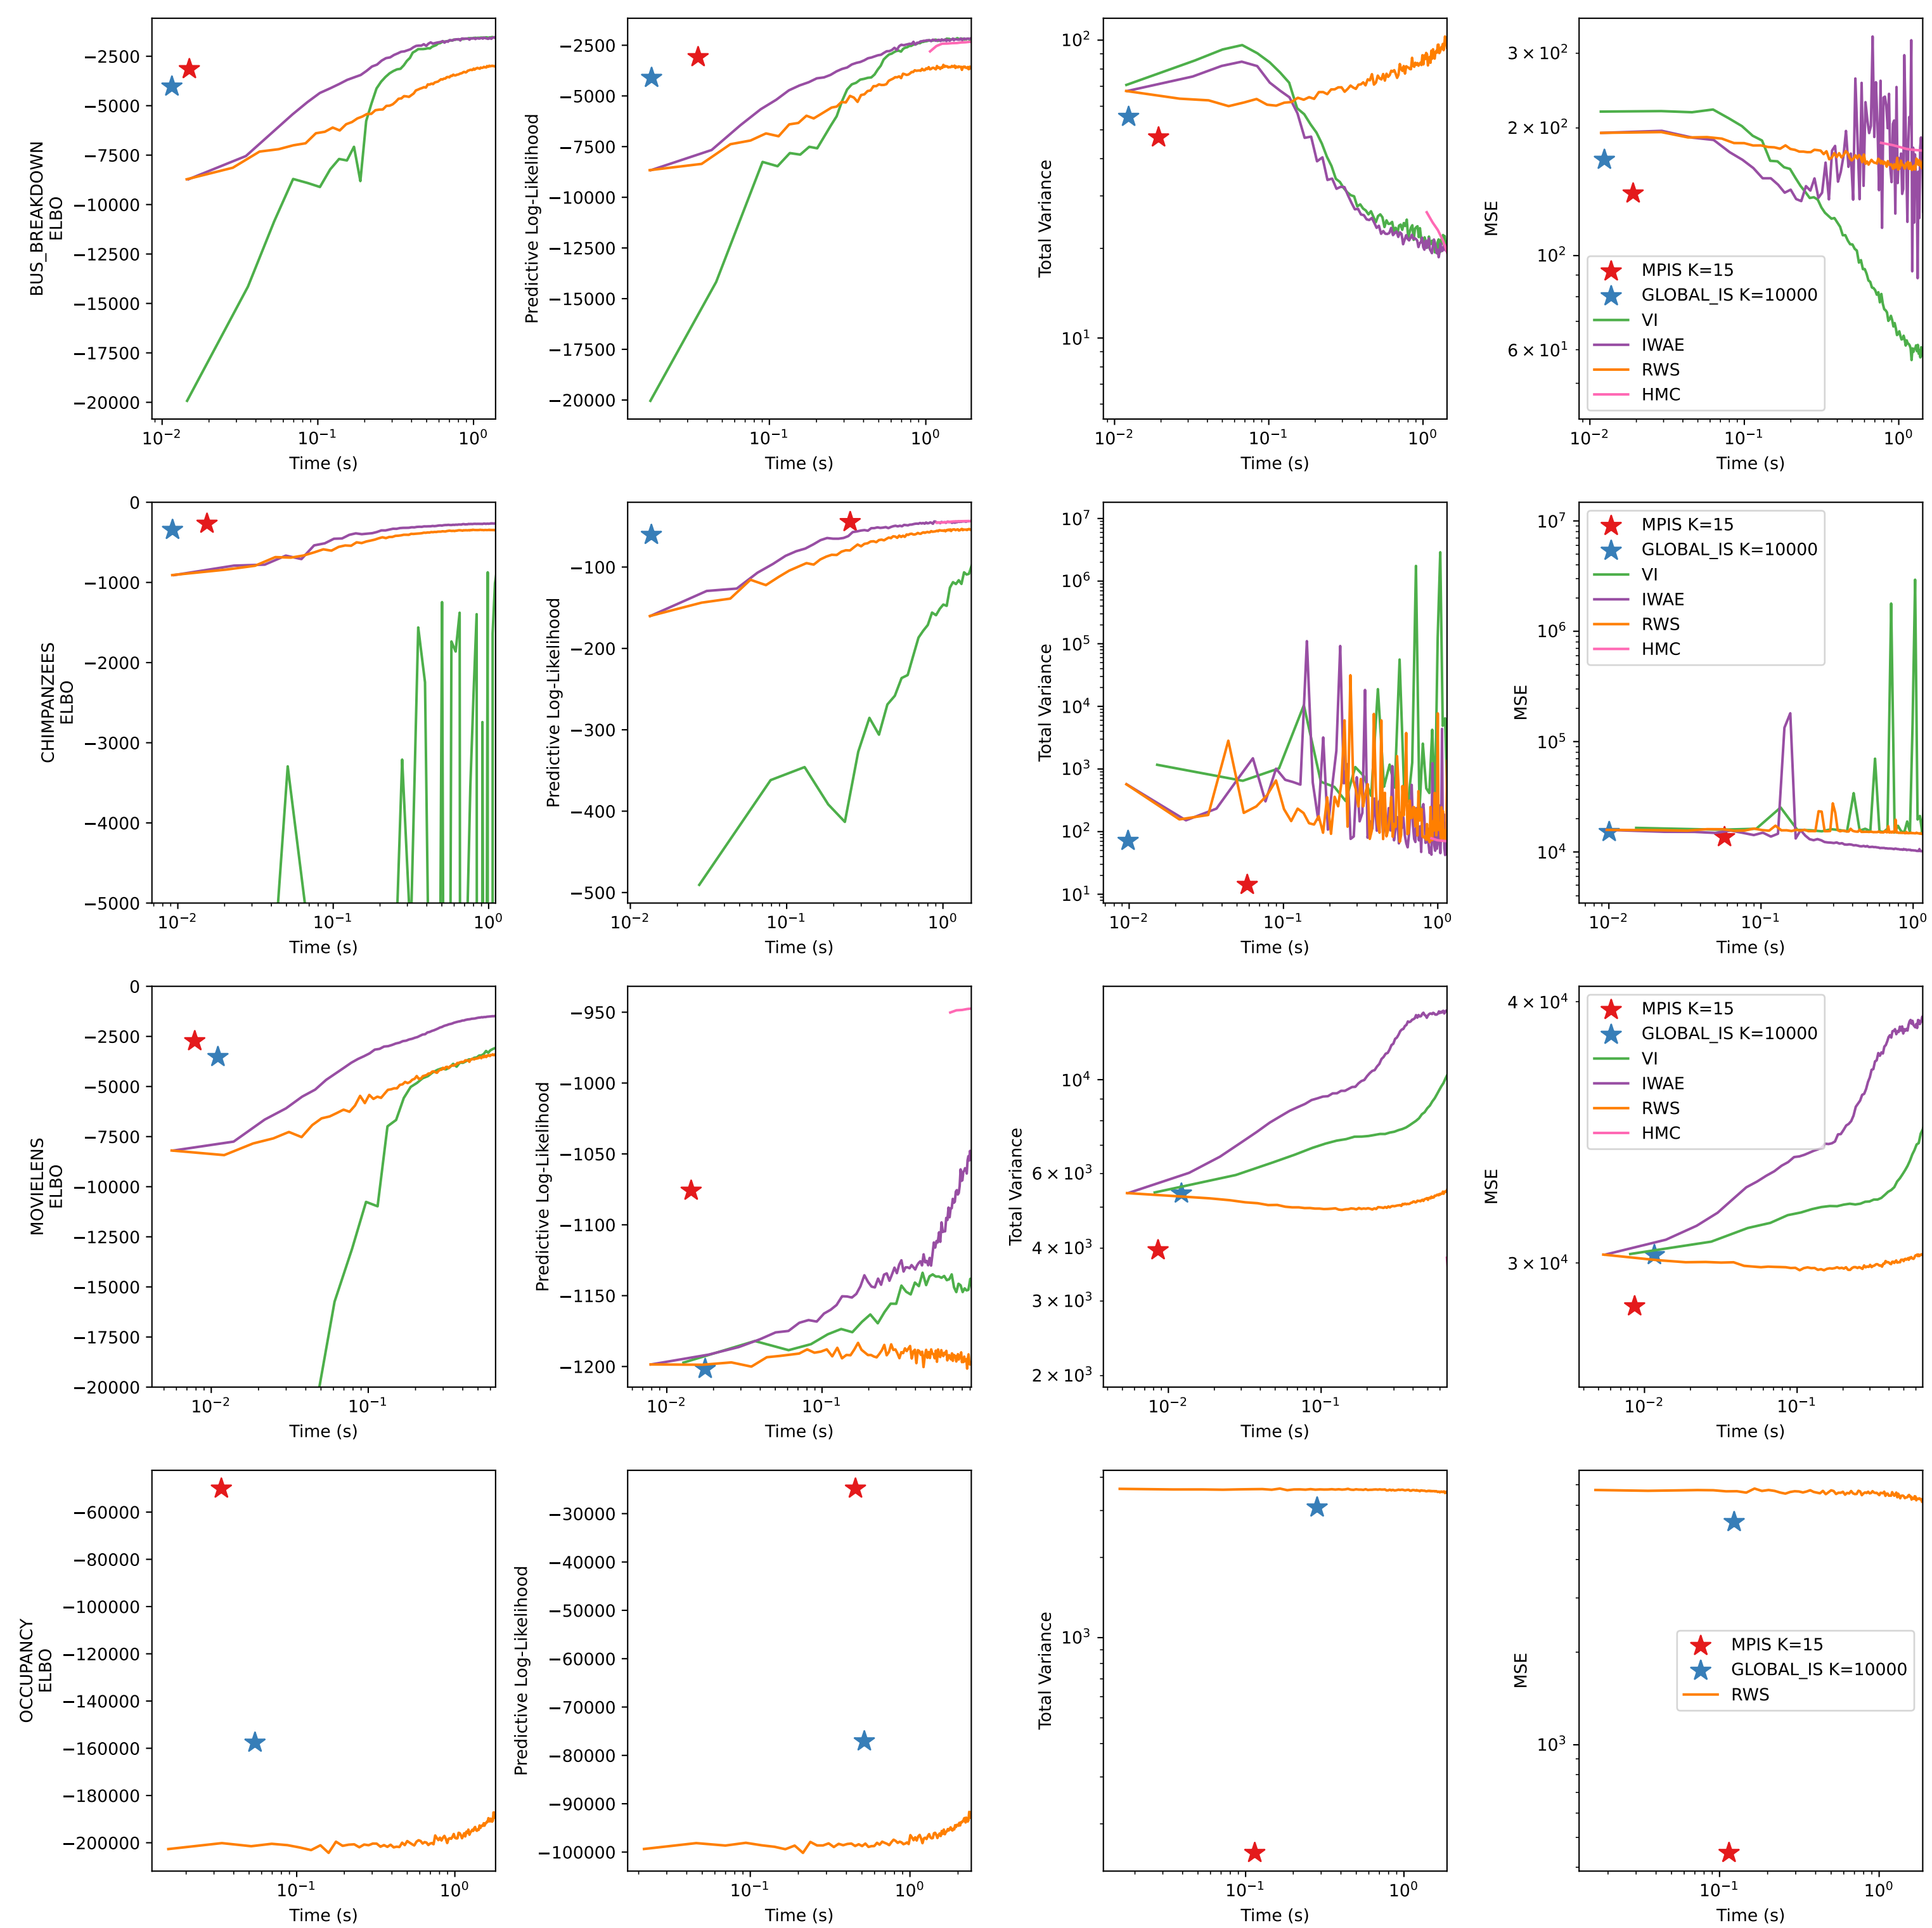

Supplement: supplementary_material [file attachment]

BUS\_BREAKDOWN

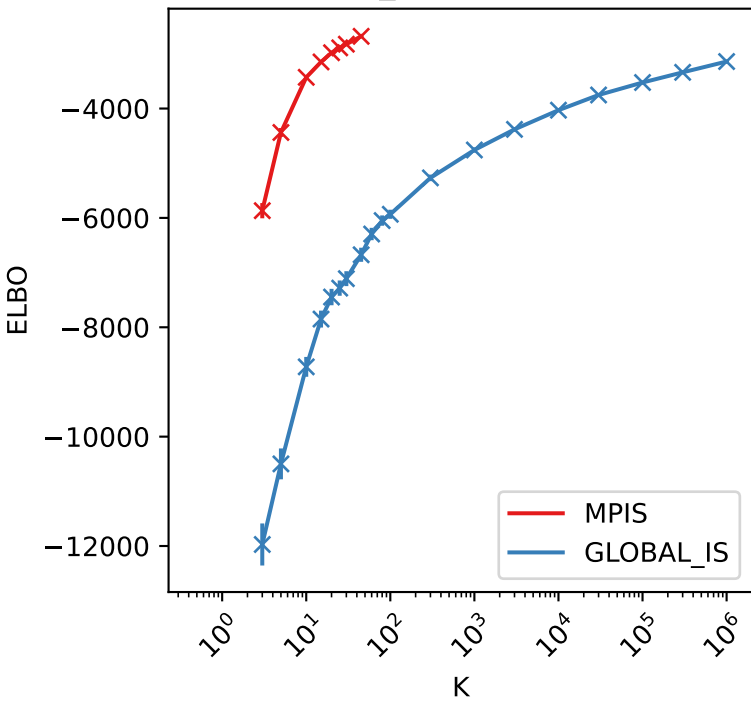

CHIMPANZEES

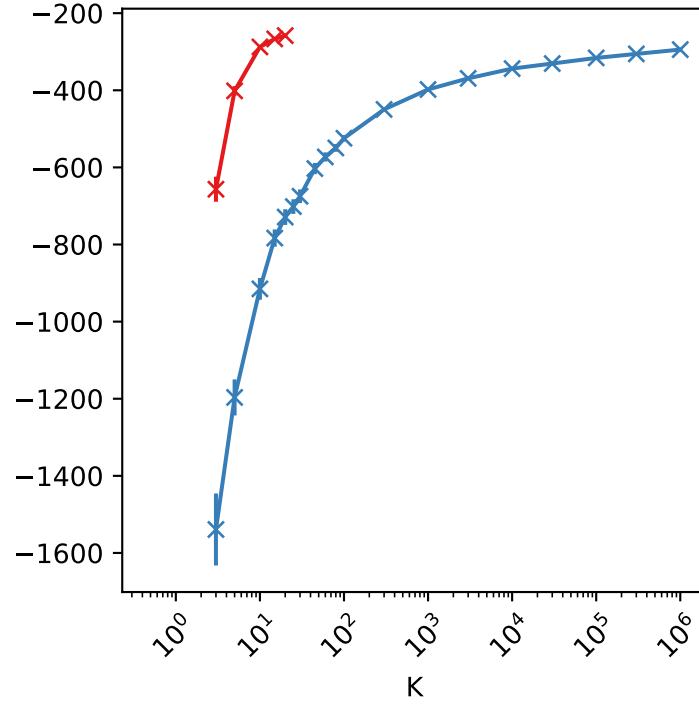

MOVIELENS

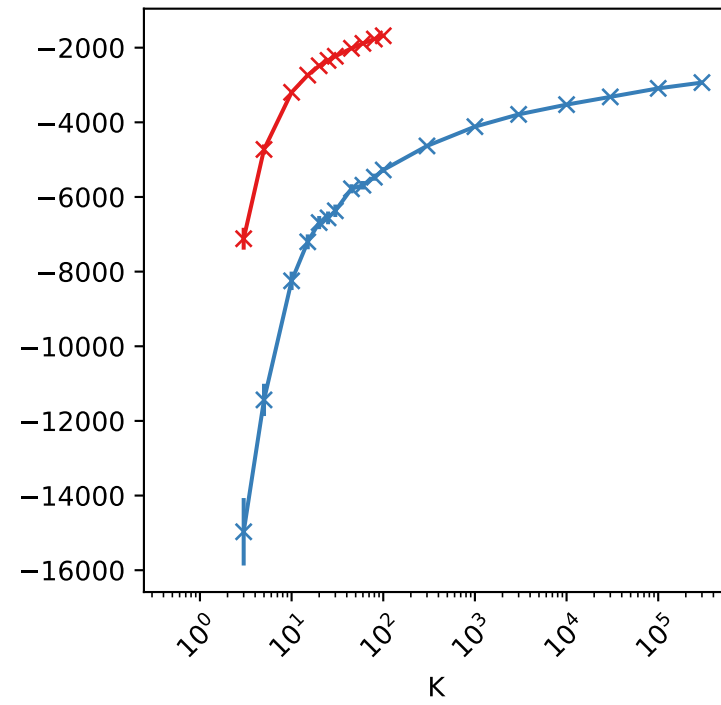

OCCUPANCY

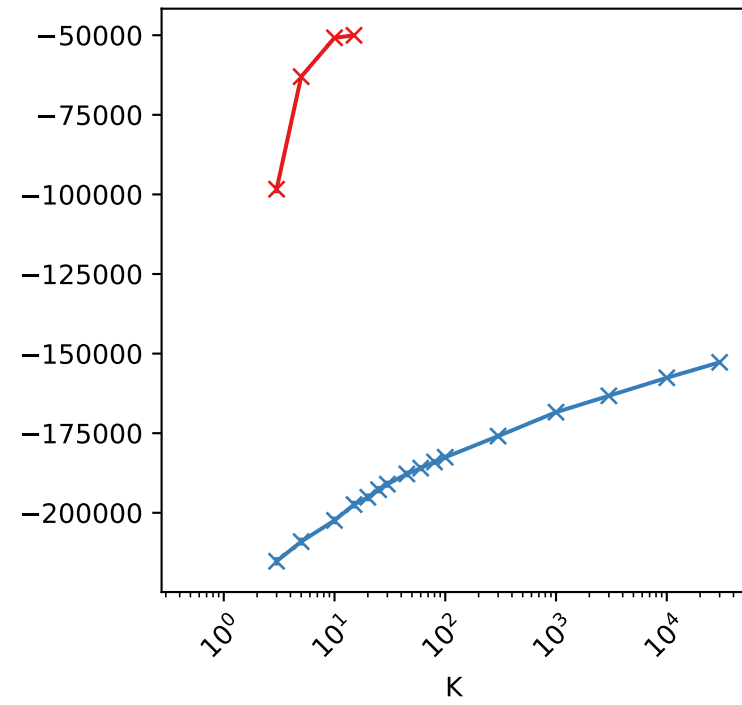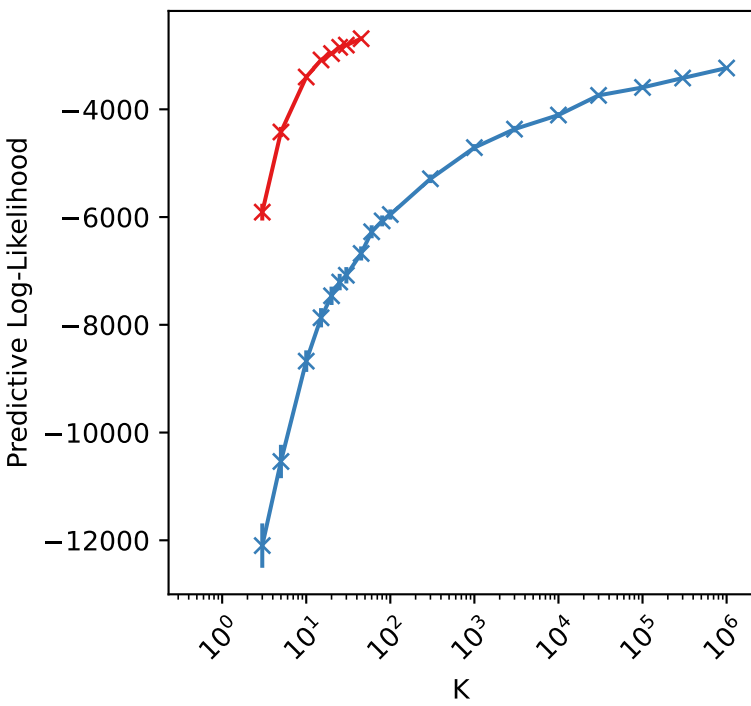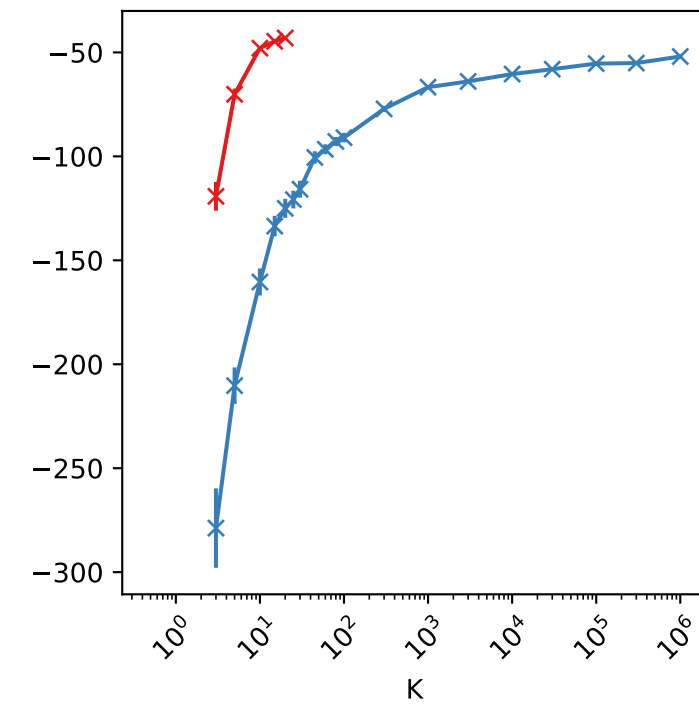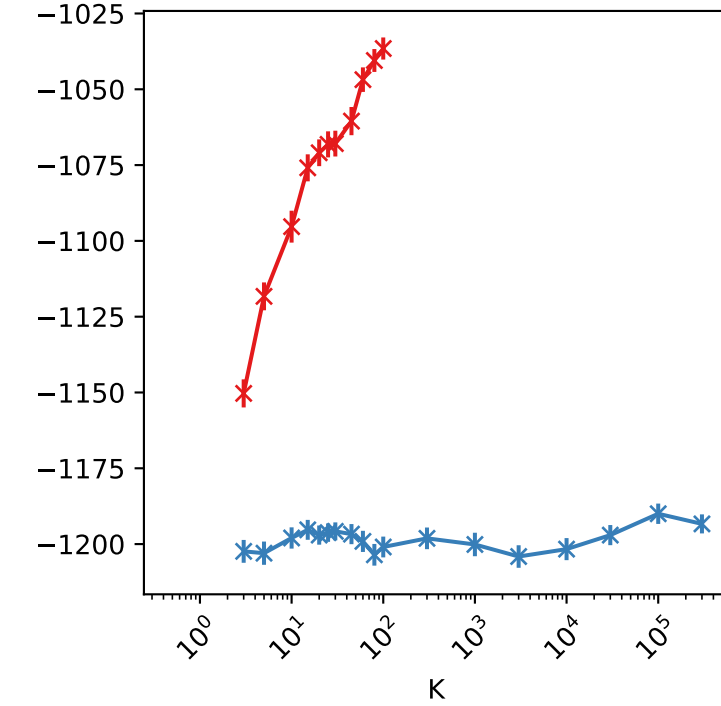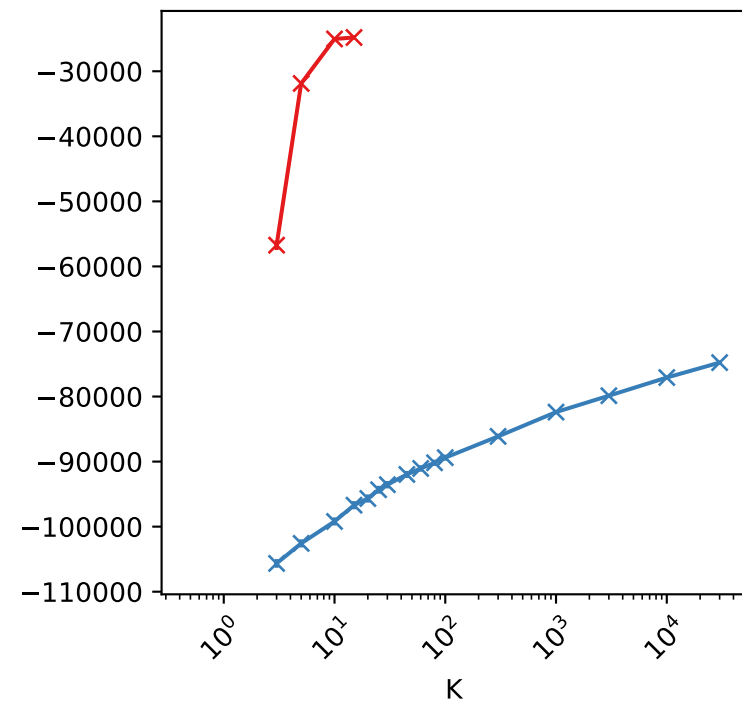

Supplement: supplementary_material [file attachment]

BUS\_BREAKDOWN

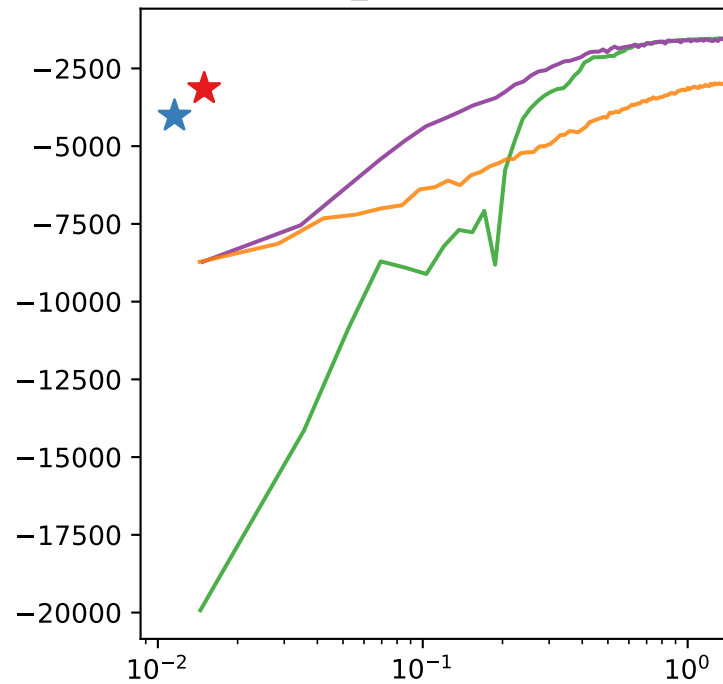

CHIMPANZEES

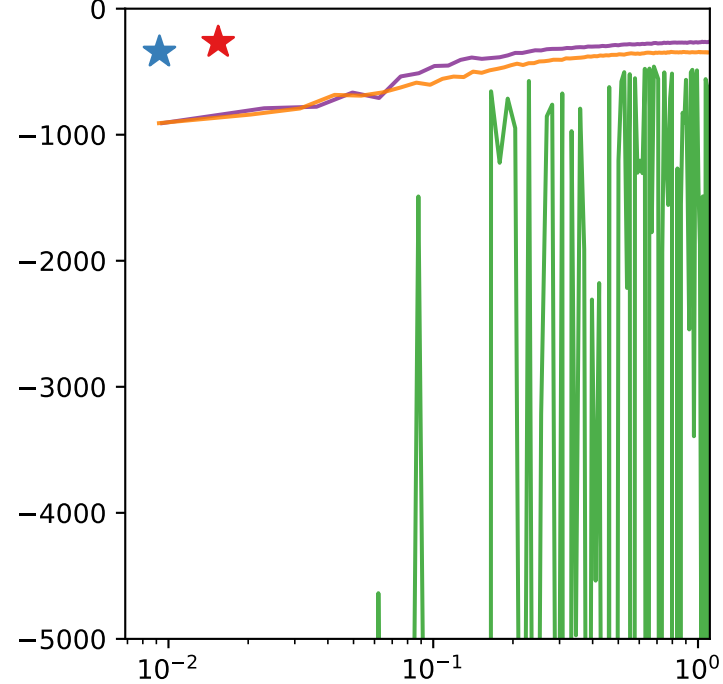

MOVIELENS

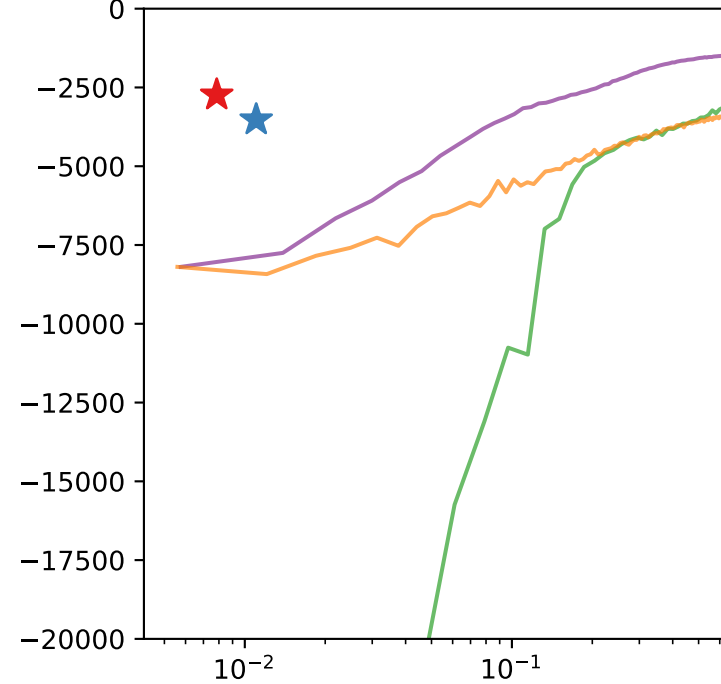

OCCUPANCY

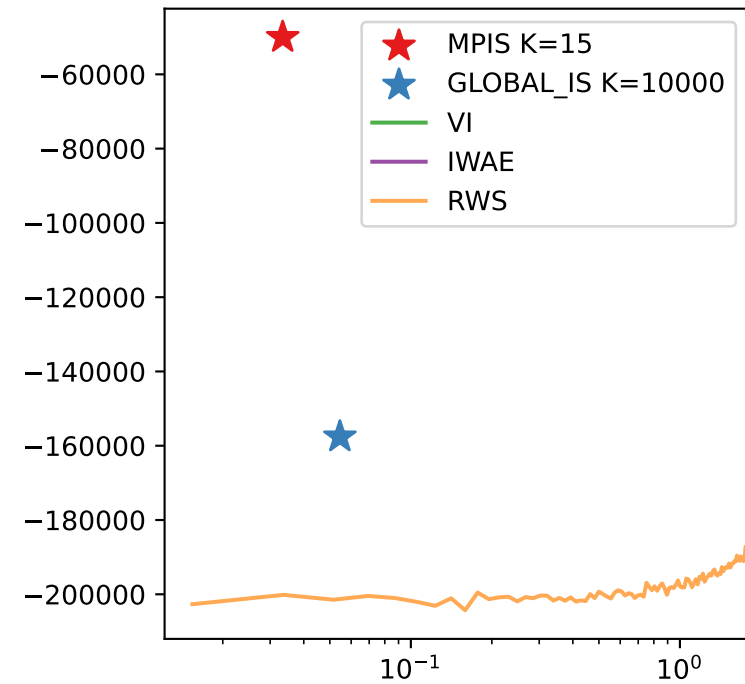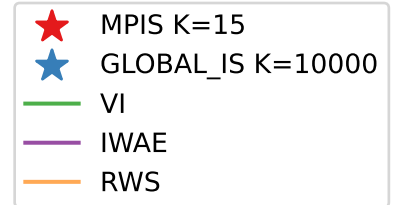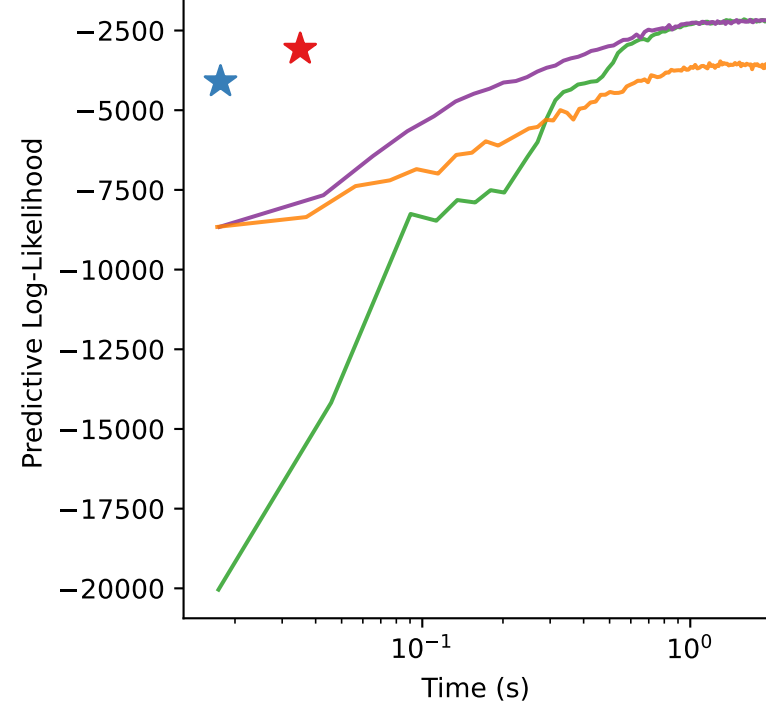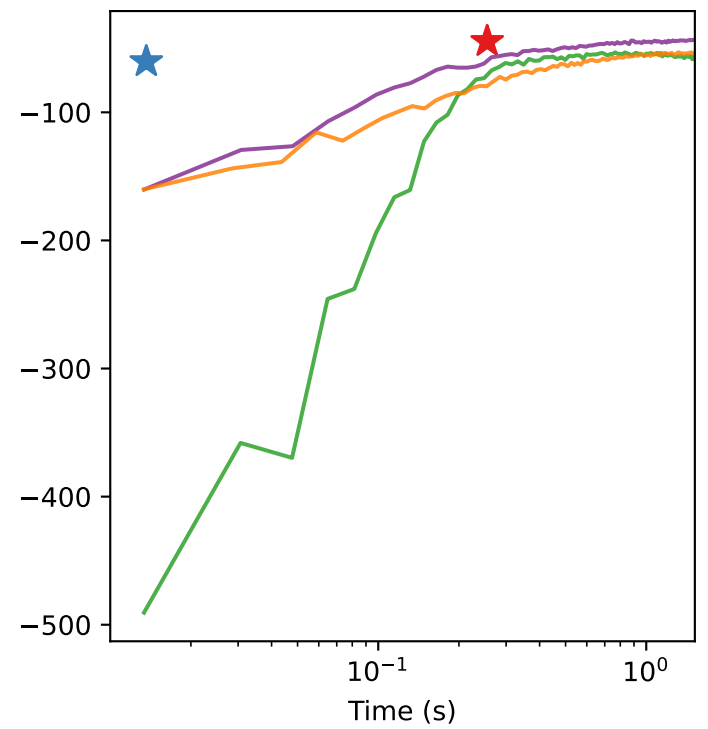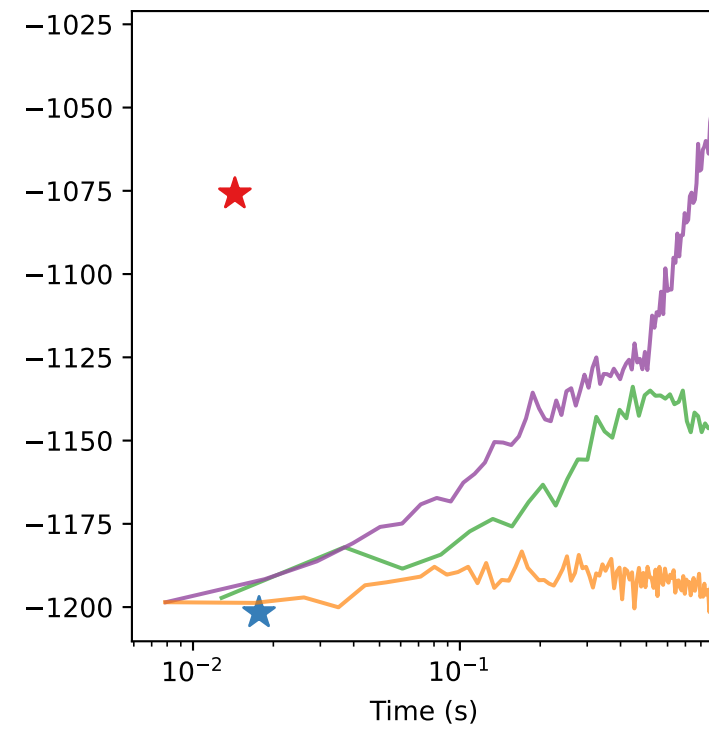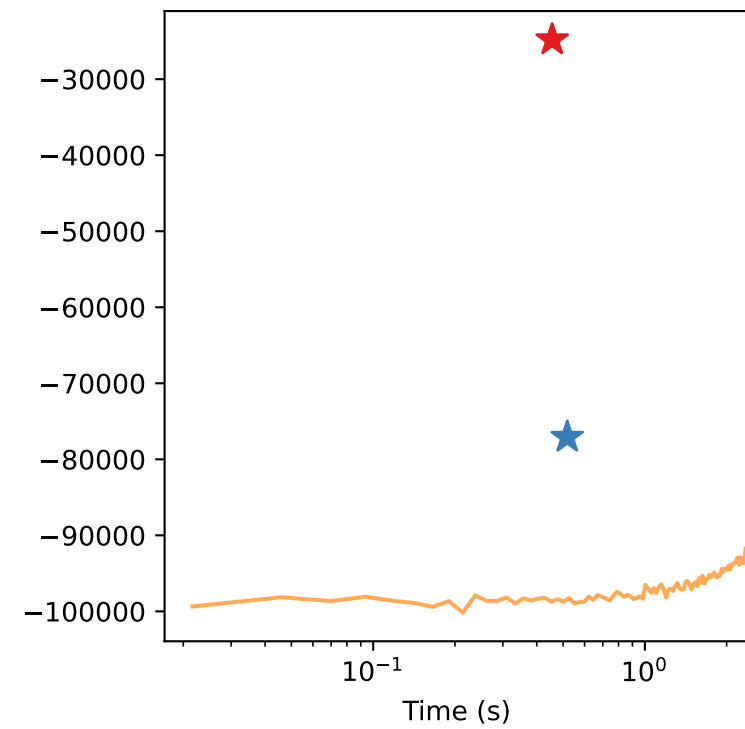

Supplement: supplementary_material [file attachment]

BUS\_BREAKDOWN

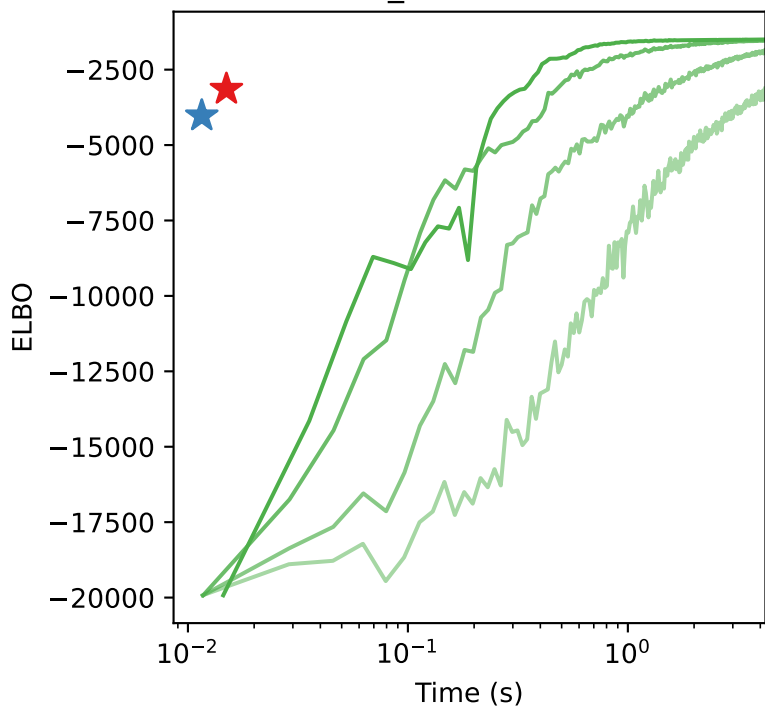

CHIMPANZEES

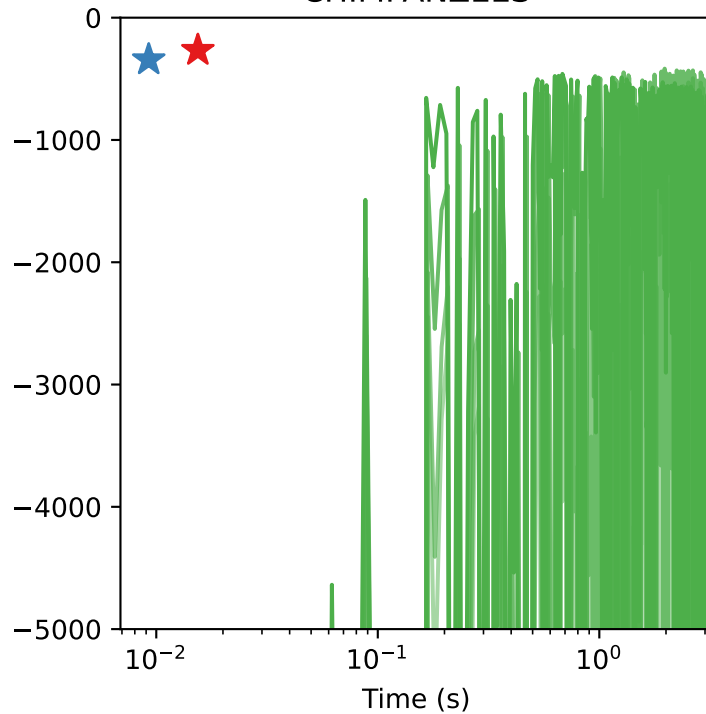

MOVIELENS

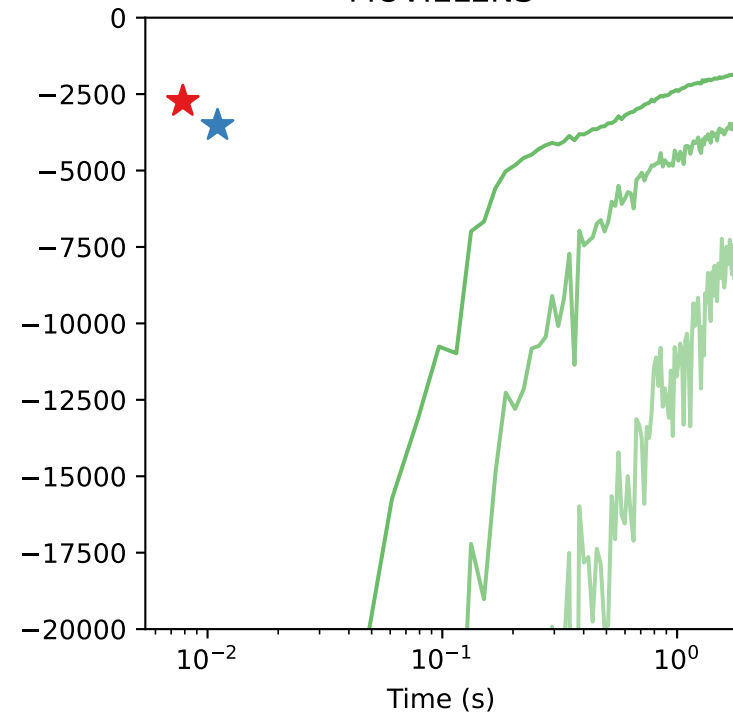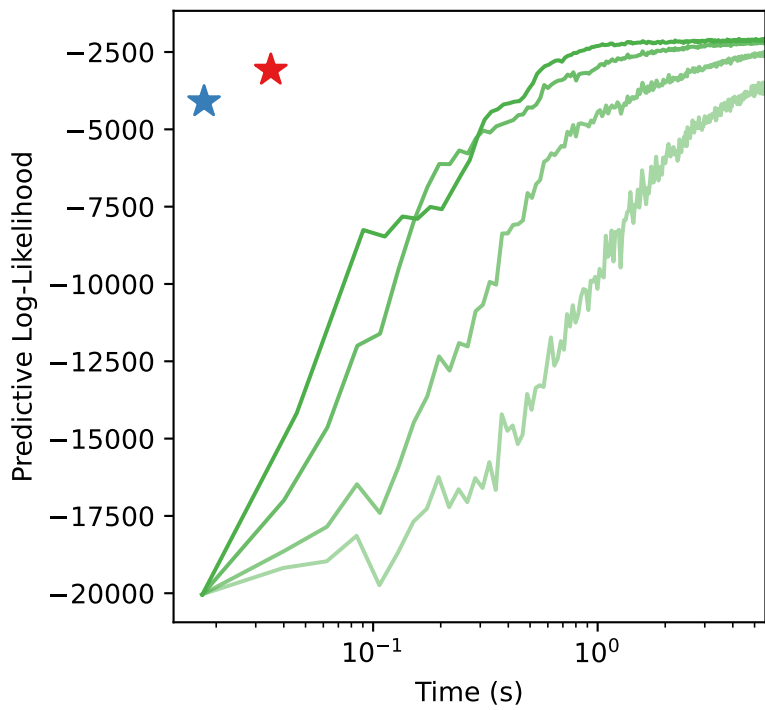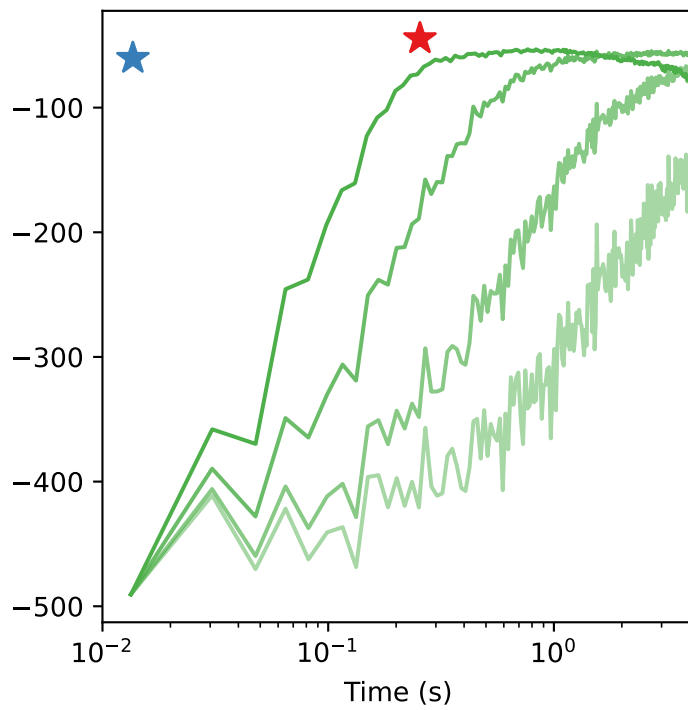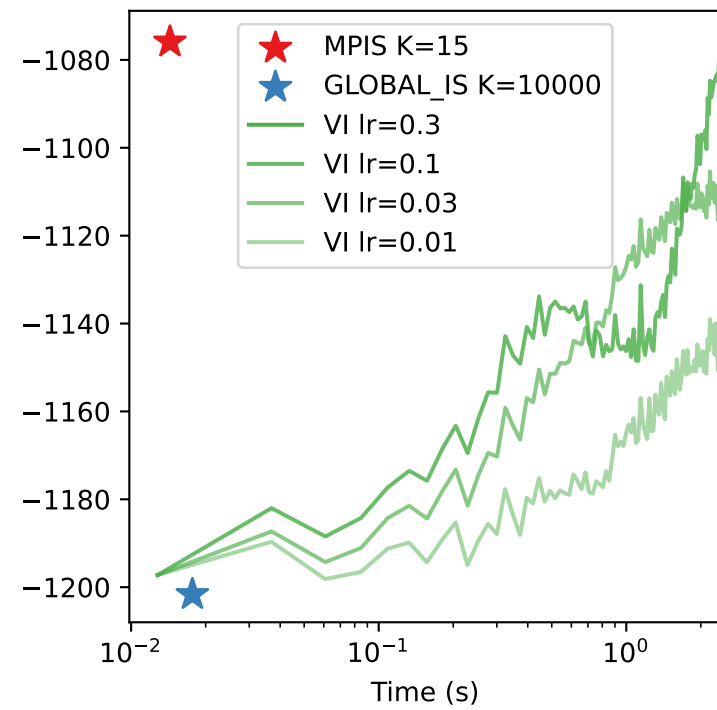

Supplement: supplementary_material [file attachment]

BUS\_BREAKDOWN

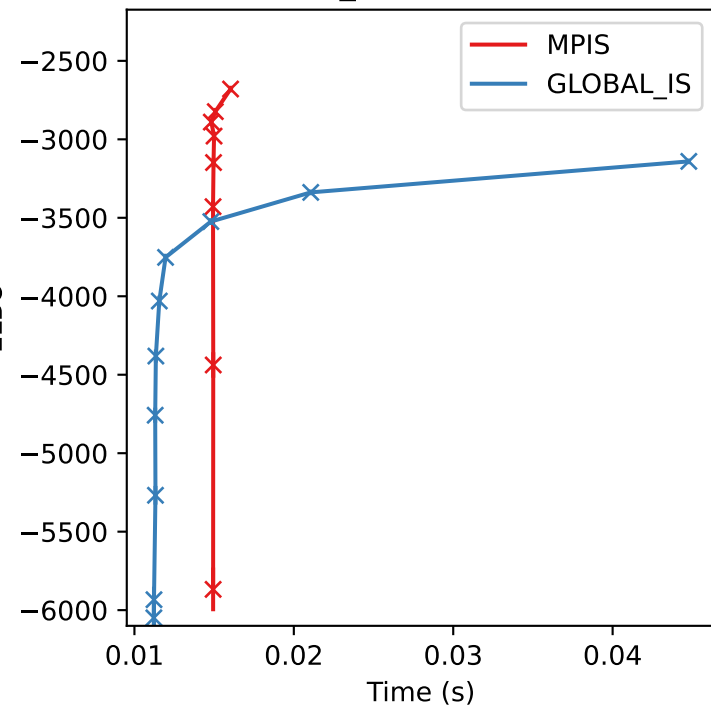

CHIMPANZEES

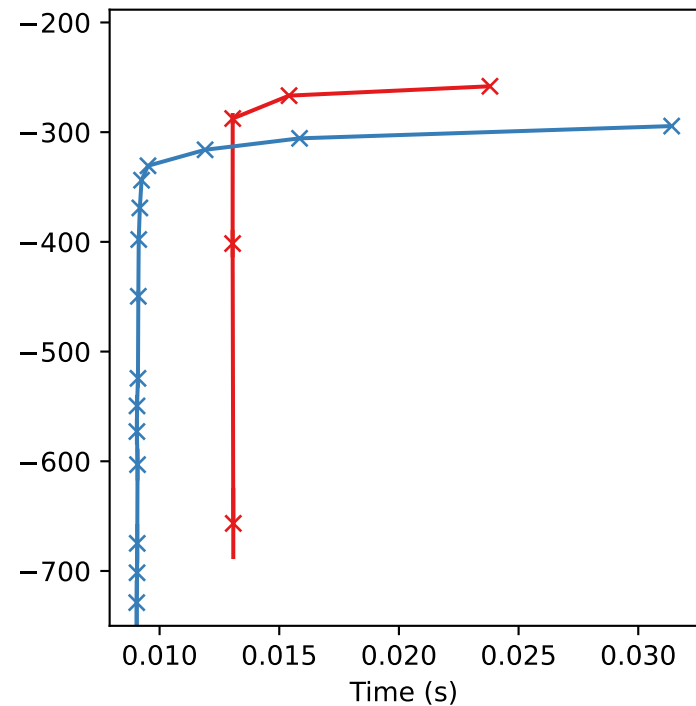

MOVIELENS

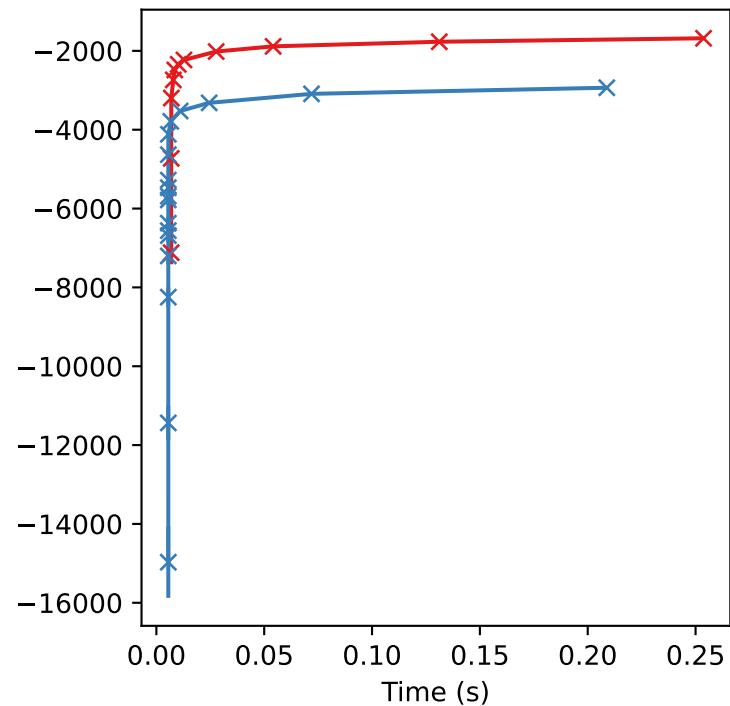

OCCUPANCY

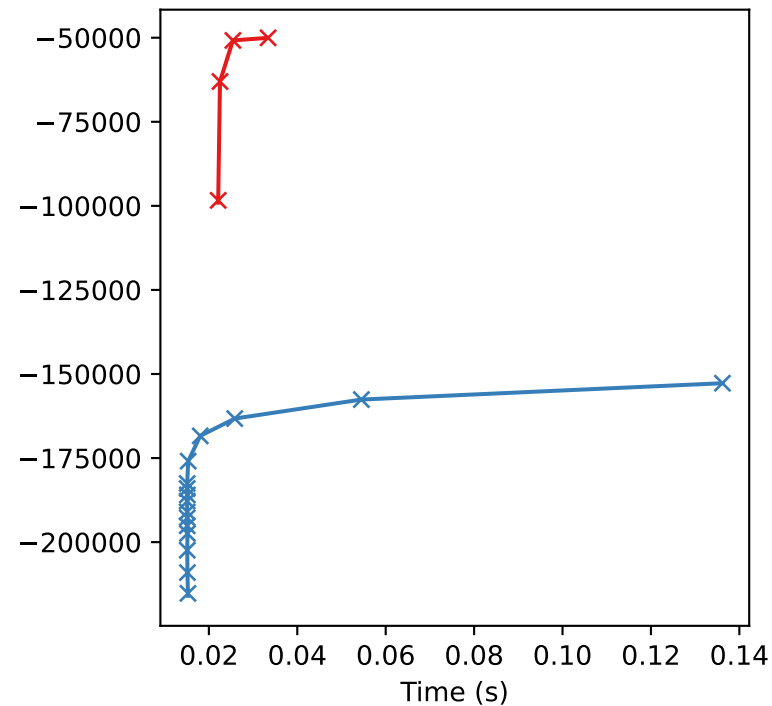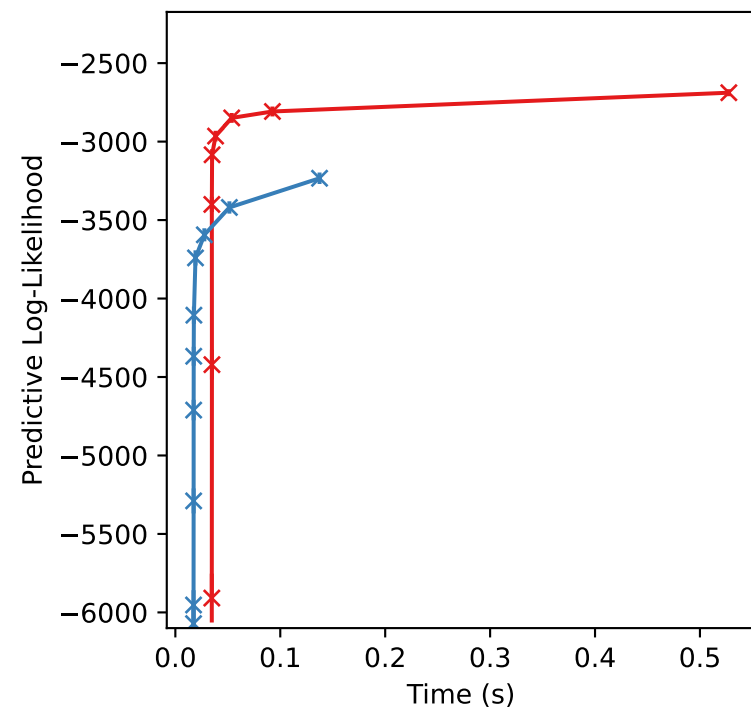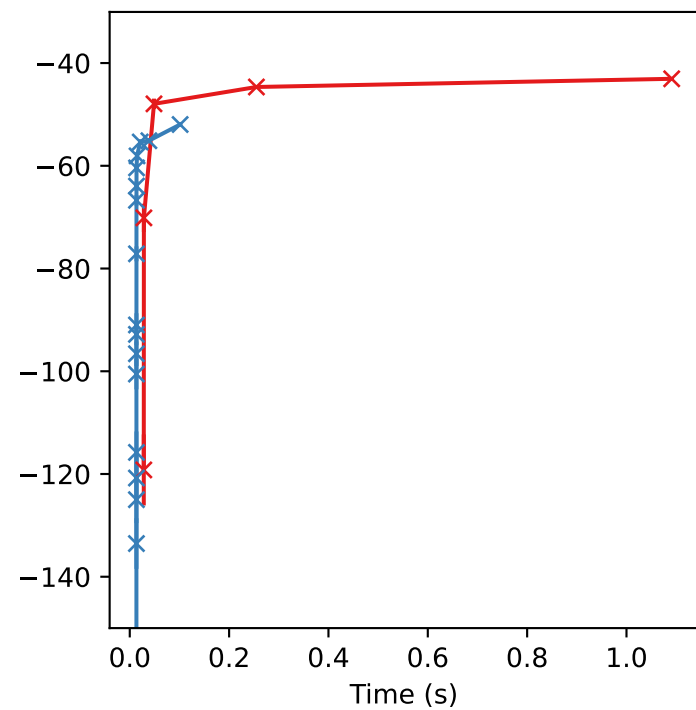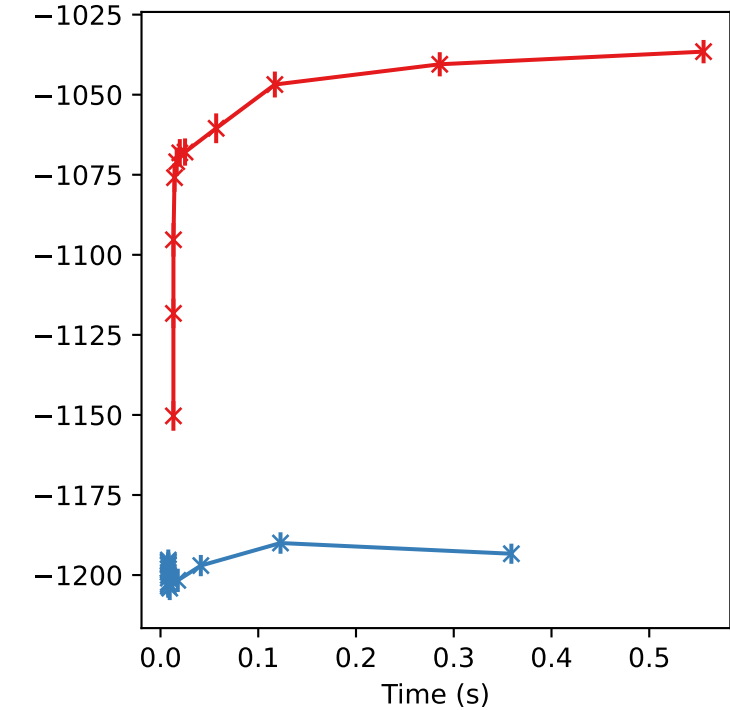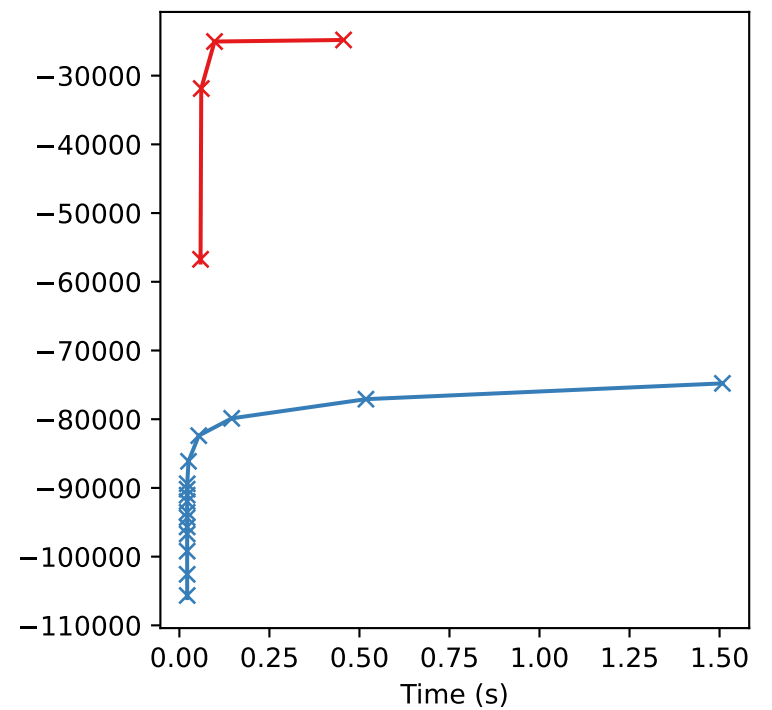

Supplement: supplementary_material [file attachment]

BUS\_BREAKDOWN

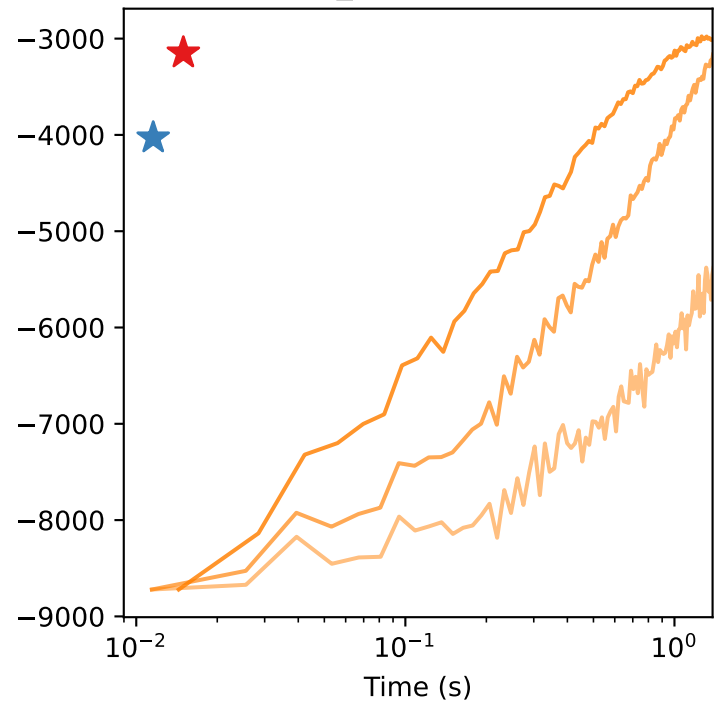

CHIMPANZEES

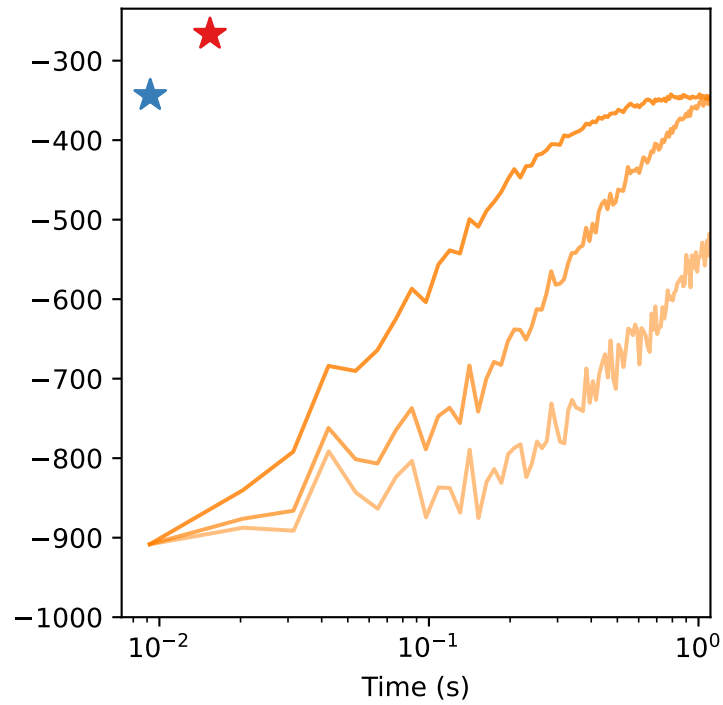

MOVIELENS

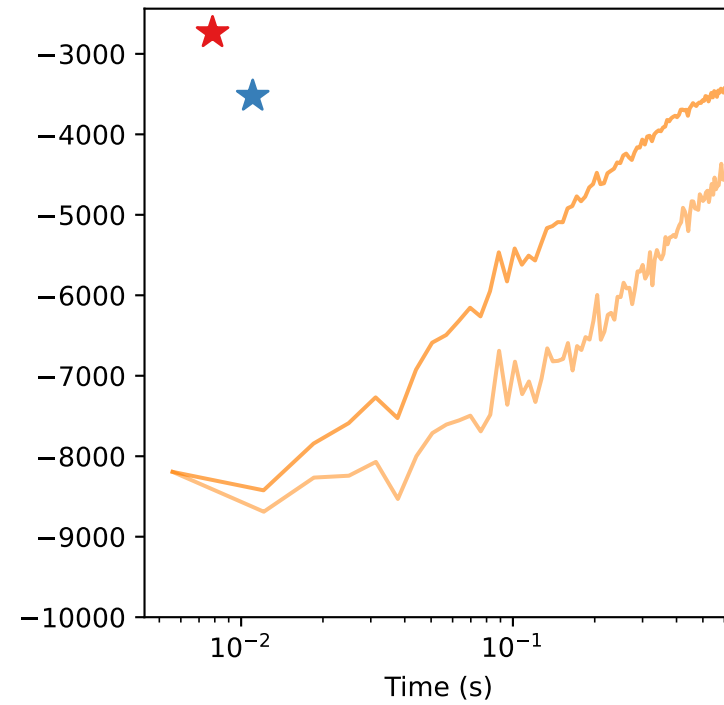

OCCUPANCY

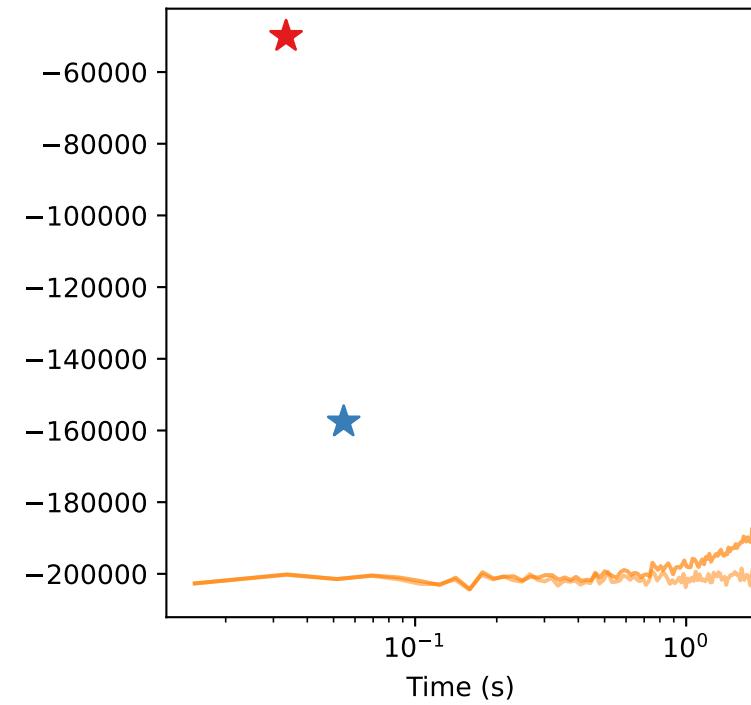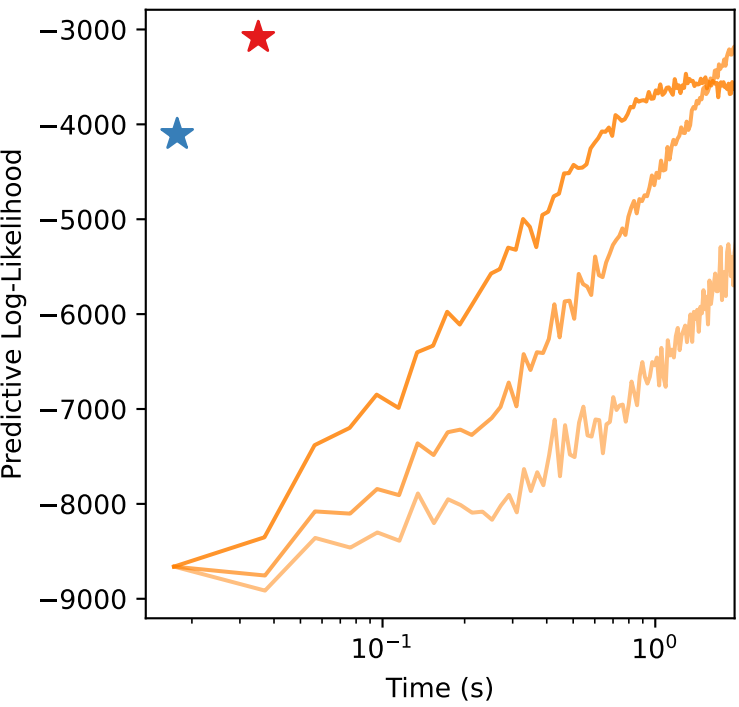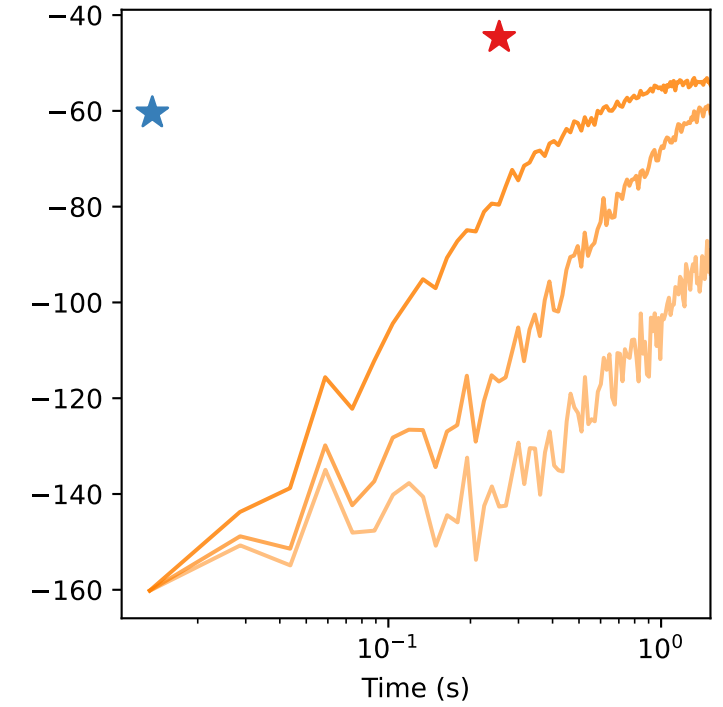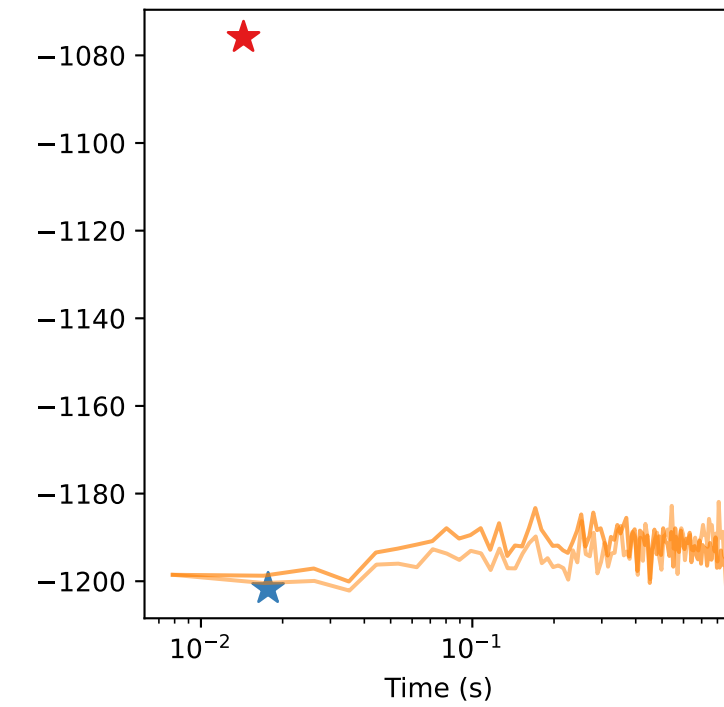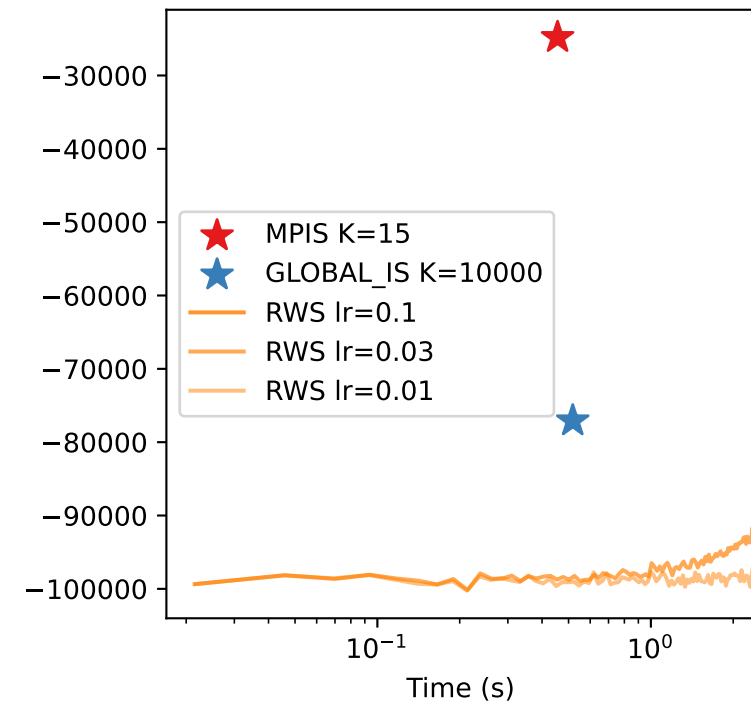

Supplement: supplementary_material [file attachment]
